# Supplementary material for: Black phosphorus quantum dots prevent atherosclerosis in high-fat diet-fed apolipoprotein E knockout mice
Source: publisher site journal article supplement (doi:10.18632/aging.205874), 2024-07-10
Supplement: Supplementary file [file aging-v16i13-205874-supplementary-material-SD1.pdf]

## SUPPLEMENTARY FIGURES

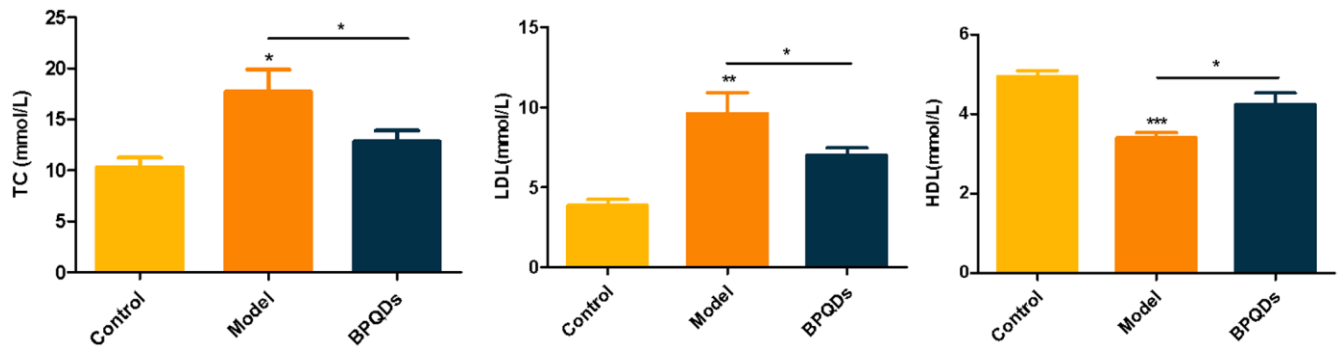

Supplementary Figure 1. Serum blood lipids index of mice.

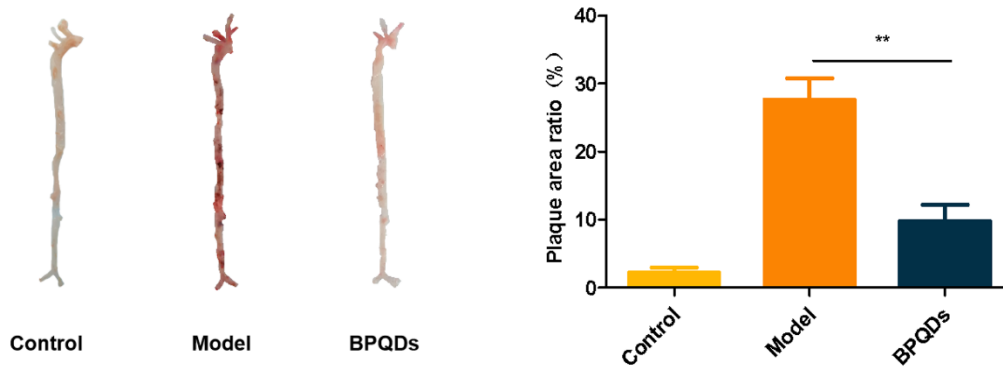

Supplementary Figure 2. Aorta oil red O staining of aorta and corresponding statistical analysis.
